# Supplementary material
Source: publisher figshare collection journal article supplement (https://acs.figshare.com/ndownloader/files/3891544)
Supplement: Supplementary file 1 [file 3891544]

**Supporting Information**

**Versatile Electronic Properties of VSe<sub>2</sub> Bulk, Few-layer, Monolayer,  
Nanoribbons and Nanotubes: A Computational Exploration**

Fengyu Li, Kaixiong Tu and Zhongfang Chen

*Department of Physics, Department of Chemistry, University of Puerto Rico-Rio Piedras Campus,*

*PO Box 23346, San Juan, PR 00931, USA*

**Table S1.** The optimized lattice parameters (in Å) of *T*-, *H1*-, *H2*- and *H3*-VSe<sub>2</sub> bulk from PBE-D2 computations.

|            | <i>T</i> <sup>a</sup> | <i>T</i> | <i>H1</i> | <i>H2</i> | <i>H3</i> |
|------------|-----------------------|----------|-----------|-----------|-----------|
| <i>a/b</i> | 3.35                  | 3.33     | 3.33      | 3.32      | 3.32      |
| <i>c</i>   | 6.12                  | 6.17     | 18.91     | 12.78     | 19.30     |

<sup>a</sup> Experimental measurements from Ref [Adv. Phys. **1969**, 18, 193].

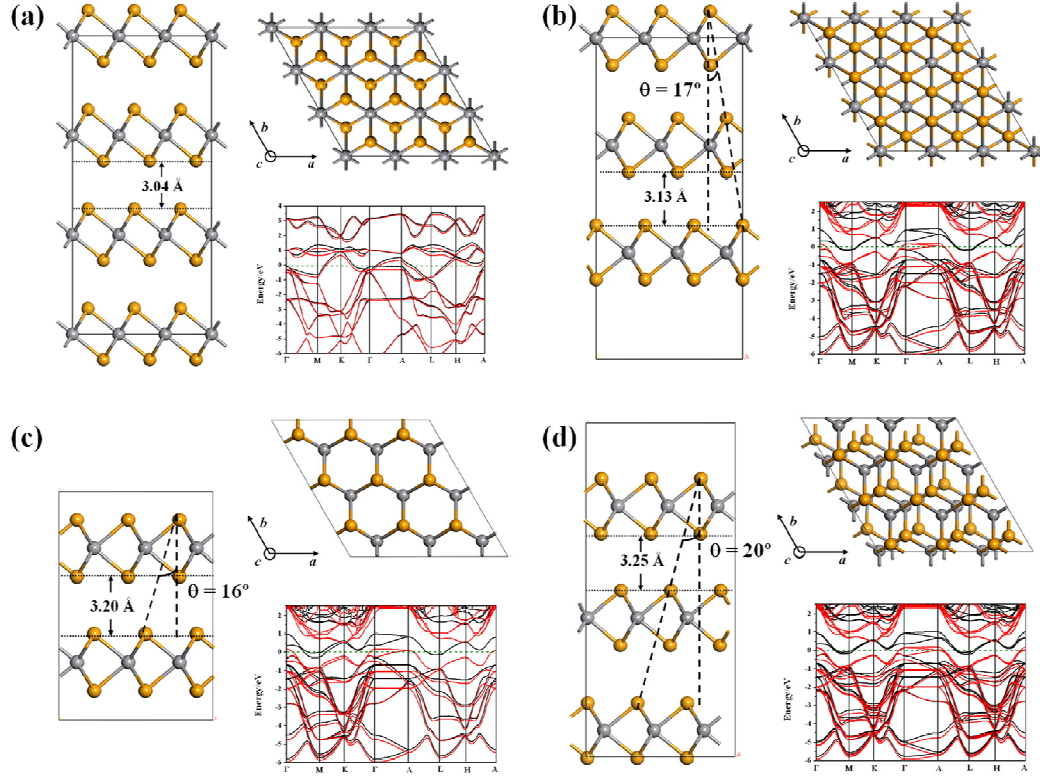

**Figure S1.** Side and top views of PBE-D2 optimized *T*- (a), *H1*- (b), *H2*- (c), and *H3*-VSe<sub>2</sub> (d) bulk (a 3×3×3 supercell), and their band structures of spin-up (black) and spin-down (red) channels. The grey and khaki atoms represent V and Se atoms, respectively. The Fermi energy is denoted by a green dashed line.

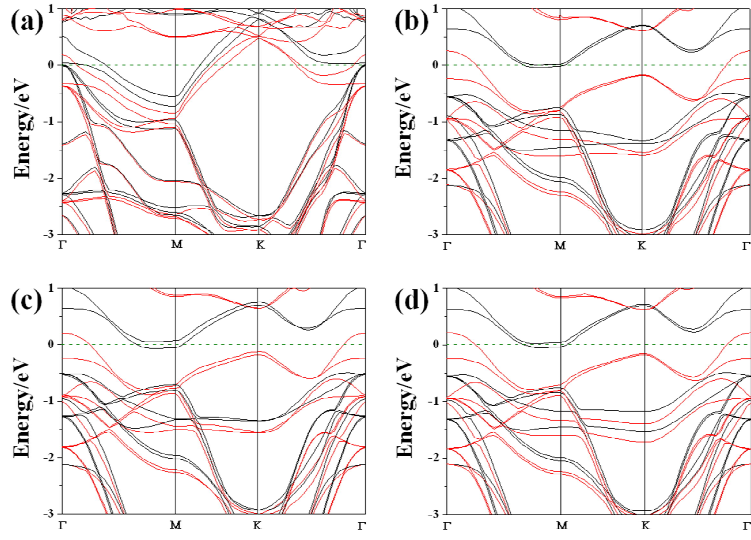

**Figure S2.** Band structures of spin-up (black) and spin-down (red) channels for 2-layer sheet in  $T$  (a),  $H1$  (b),  $H2$  (c) and  $H3$  (d) phases.

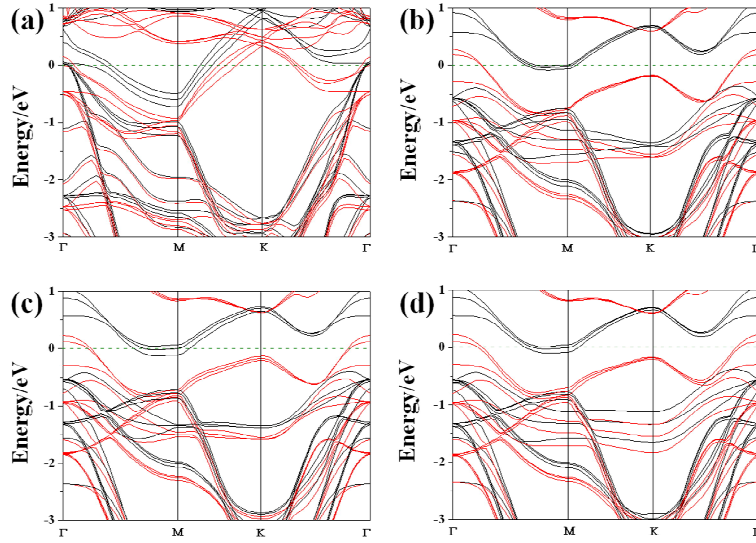

**Figure S3.** Band structures of spin-up (black) and spin-down (red) channels for 3-layer sheet in  $T$  (a),  $H1$  (b),  $H2$  (c) and  $H3$  (d) phases.

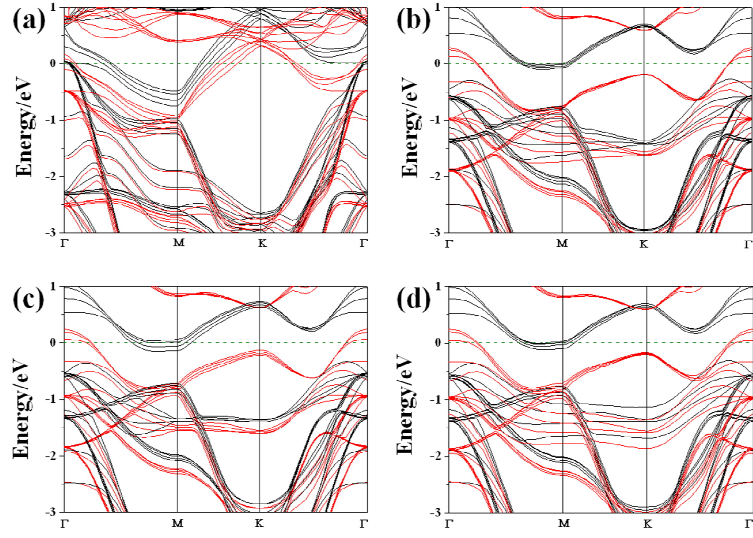

**Figure S4.** Band structures of spin-up (black) and spin-down (red) channels for 4-layer sheet in  $T$  (a),  $H1$  (b),  $H2$  (c) and  $H3$  (d) phases.

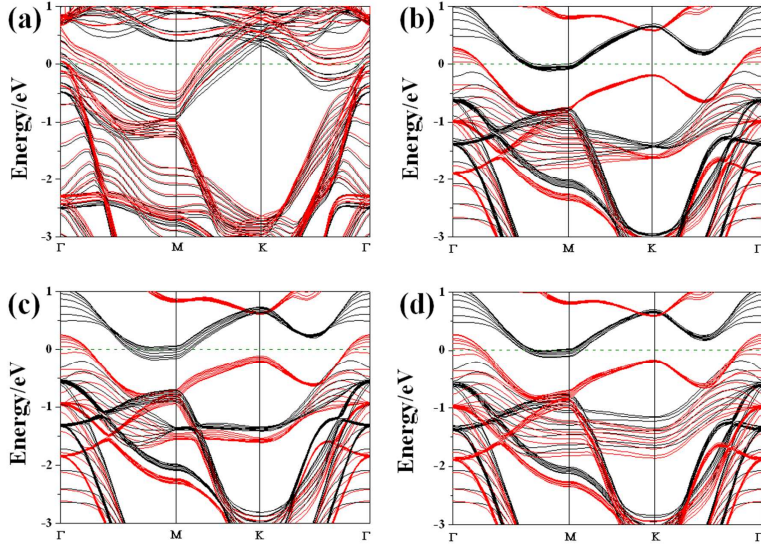

**Figure S5.** Band structures of spin-up (black) and spin-down (red) channels for 8-layer sheet in  $T$  (a),  $H1$  (b),  $H2$  (c) and  $H3$  (d) phases.



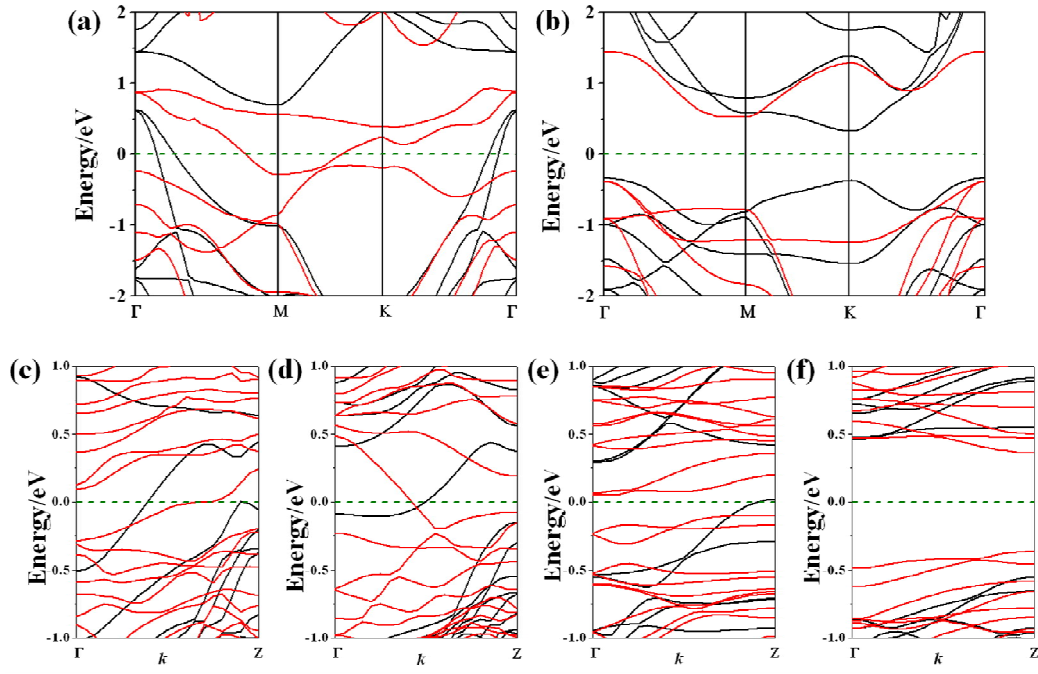

**Figure S6.** Band structures of spin-up (black) and spin-down (red) channels for  $\text{VSe}_2$  monolayer in  $T$  (a) and  $H$  (b) phases, bare  $z$ -5  $T$ -NR (c) and  $z$ -6  $H$ -NR (d), hydrogenated  $a$ -8  $T$ -NR (e) and  $a$ -7  $H$ -NR (f).

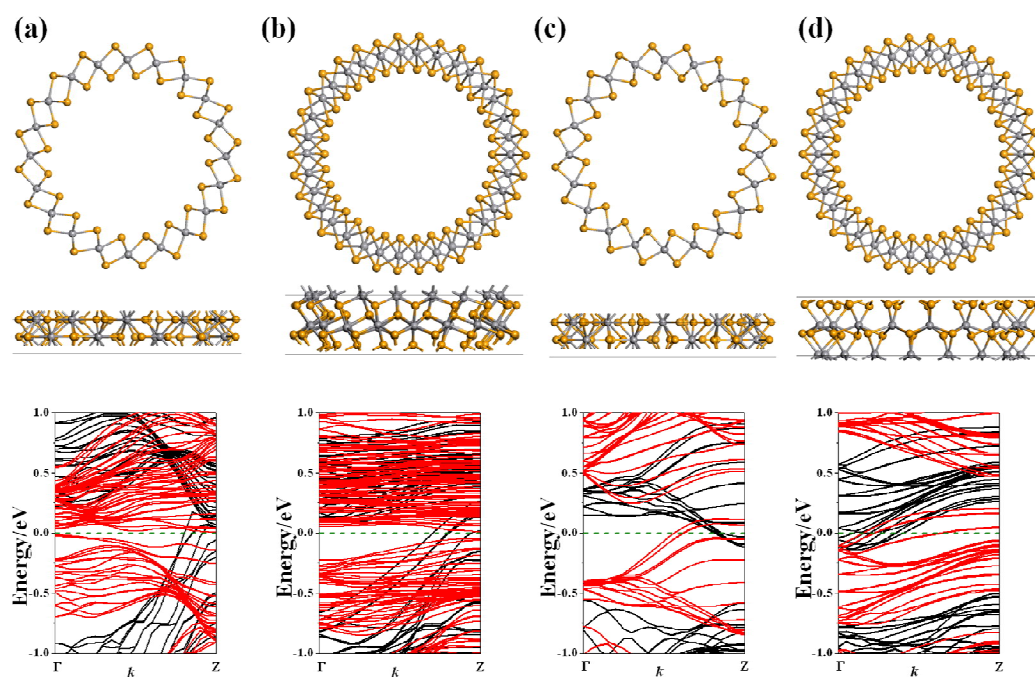

**Figure S7.** Top and side views of (10,10) and (17,0) nanotubes in the *T* (a, b) and *H* phases (c, d), and the corresponding band structures. The grey and khaki atoms represent V and Se atoms, respectively. The spin-polarized band structures with both spin-up and spin-down channel are presented in black and red, respectively. The Fermi energy is denoted by a green dashed line.
